# Supplementary material for: Validation of the Italian version of the Parkinson’s Disease- Cognitive Functional Rating Scale
Source: Springer Nature journal article supplement (doi:10.1007/s00702-024-02746-6), 2024-01-27
Supplement: MOESM1 [file 26667230]

e-Figure 1. Study Flow diagram

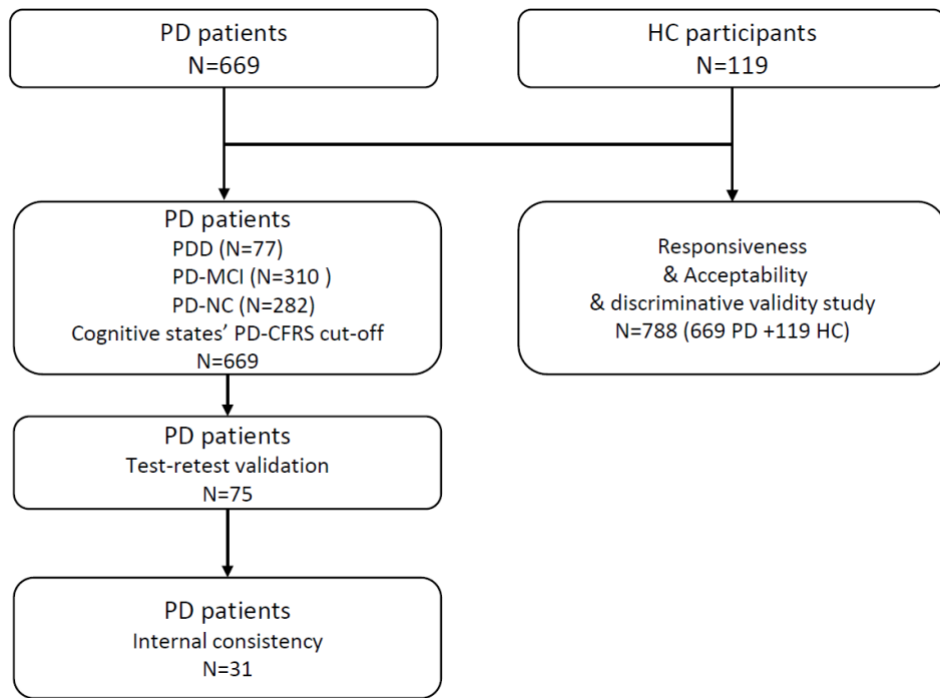

e-Figure 2. Participant recruitment distribution.

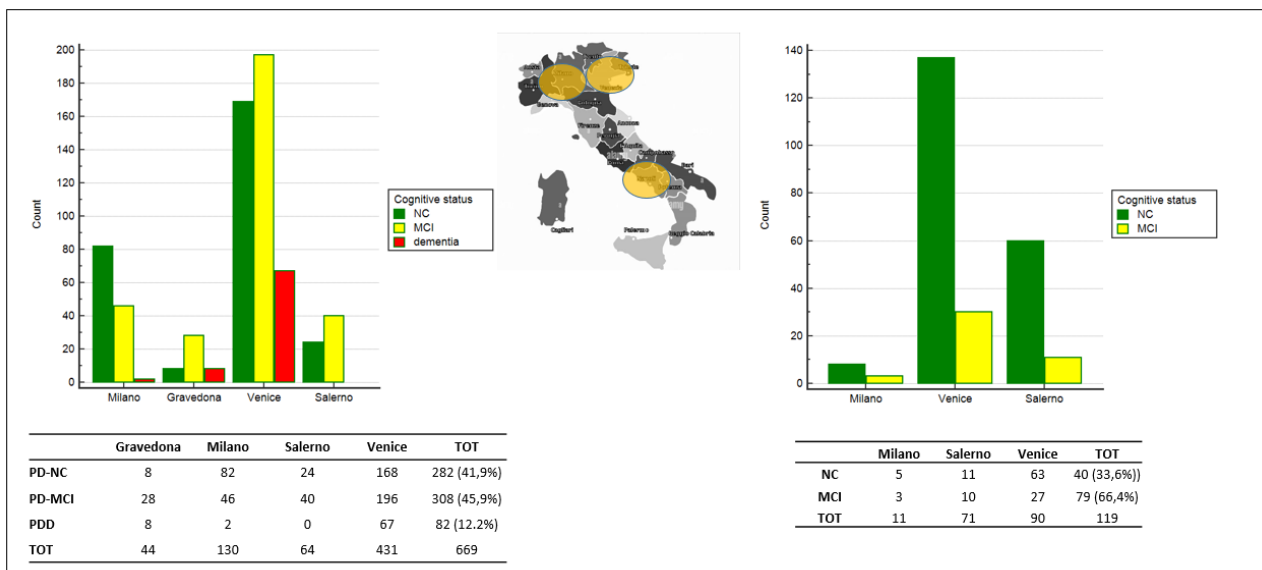

e-Figure 3. Cognitive state distribution among disease duration and age in patients with Parkinson's Disease

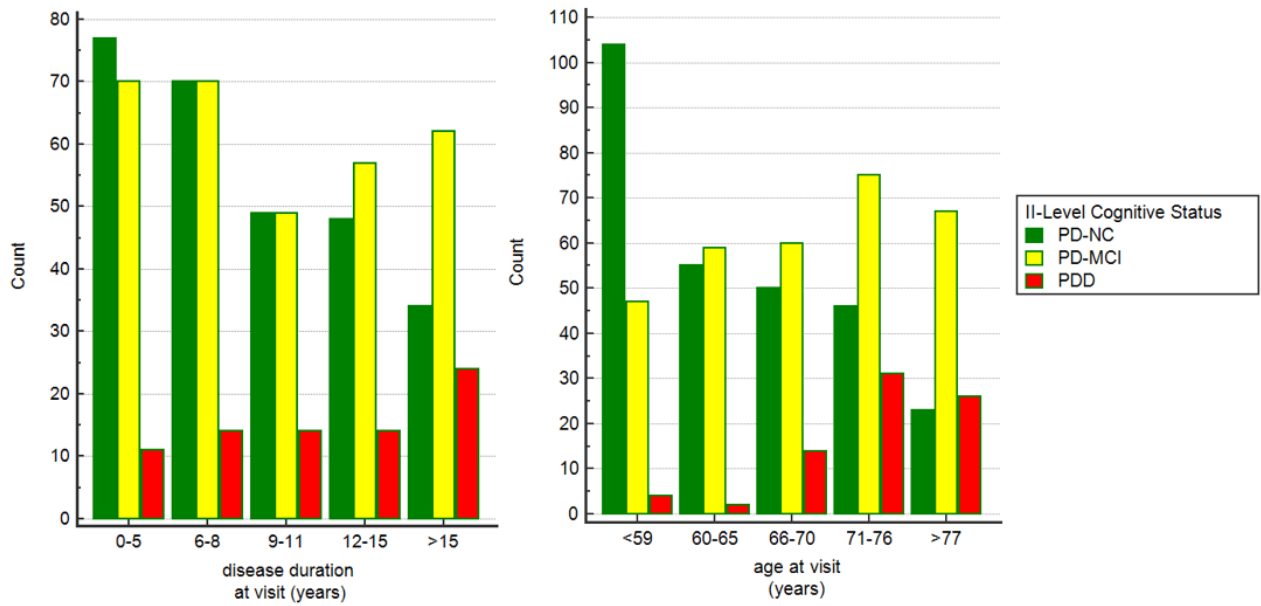

e-Figure 4. Italian version of Parkinson's Disease Cognitive Functional Rating Scale. Cronbach's  $\alpha$  If Item Dropped Posterior Plots.

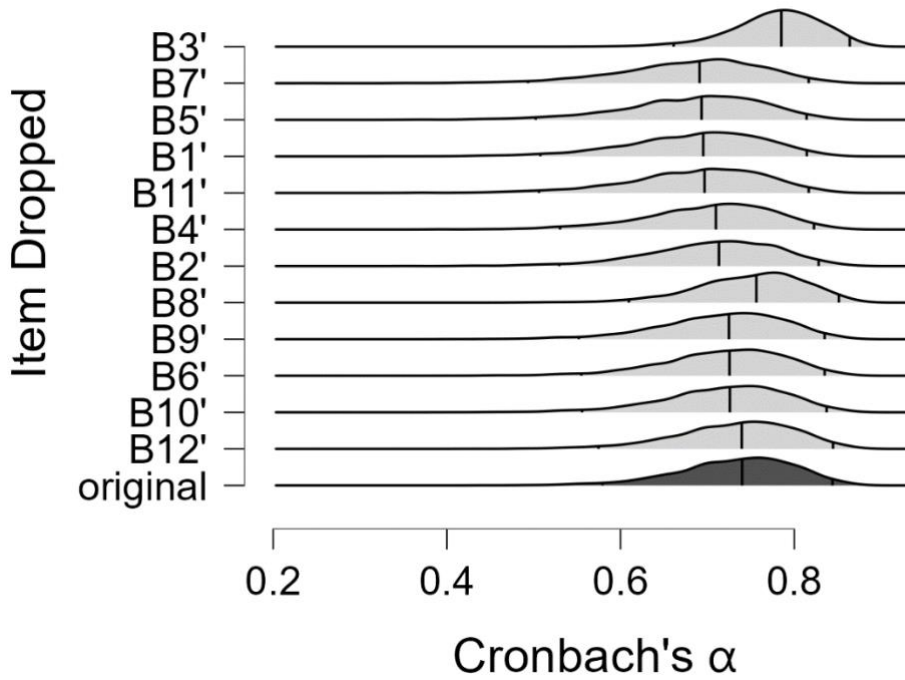

e-Figure 5. Italian version of Parkinson’s Disease Cognitive Functional Rating Scale test –retest reliability in PD population: Bland Altman Plot.

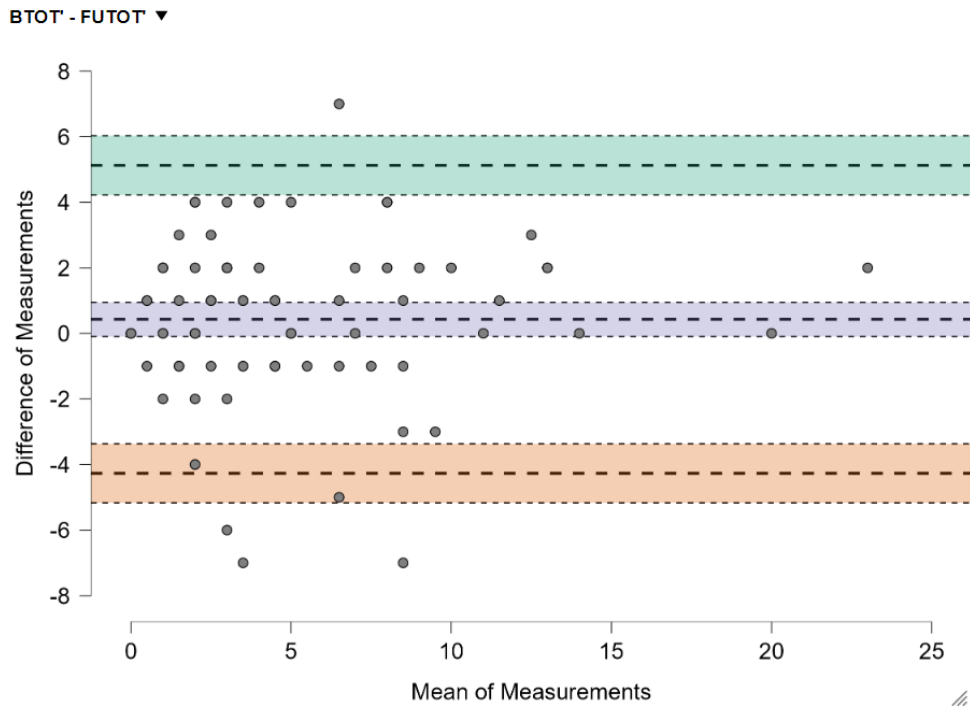

e Figure 6. Discriminant cut-off for detecting functional impairment associated to PDD.

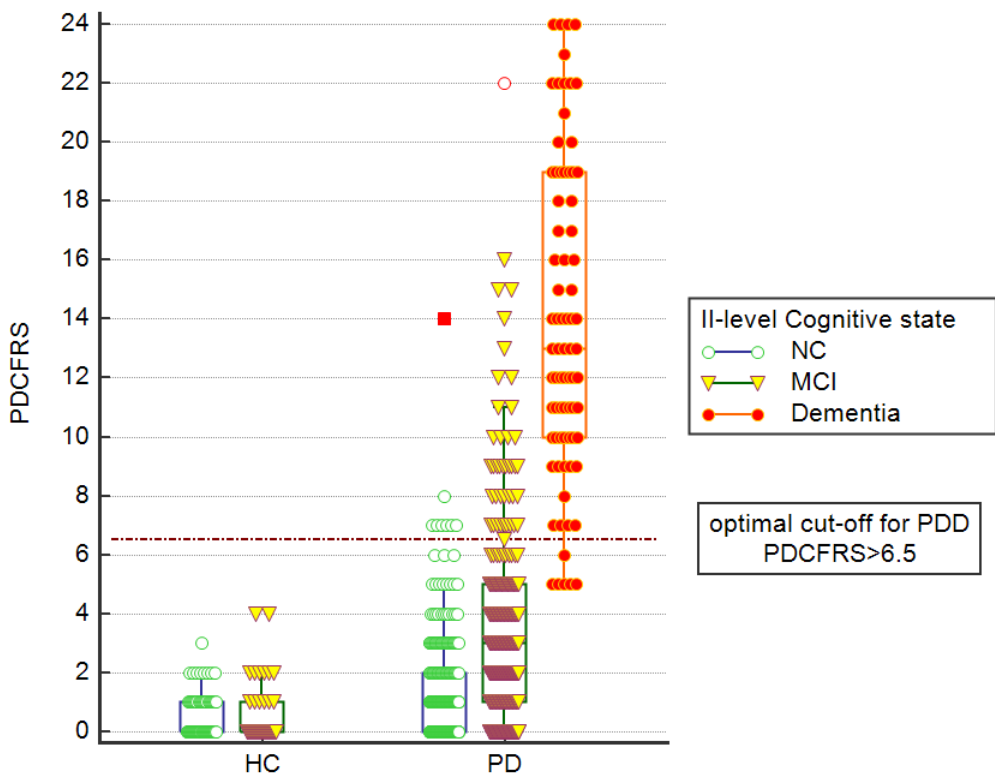

e-Table 1 Convergent and concurrent validity of the Italian version of Parkinson's Disease Cognitive Functional Rating Scale

|                            | Overall PD      |         |
|----------------------------|-----------------|---------|
|                            | PDCFRS score    |         |
|                            | N=669           |         |
|                            | Correlation     | P value |
|                            | Coefficient [r] |         |
| <i>Convergent Validity</i> |                 |         |
| Age at visit               | 0,264           | <0,0001 |
| Age at motor onset         | 0,129           | 0,0009  |
| Education                  | -0,212          | <0,0001 |
| LEED                       | -0,017          | 0,675   |
| DAED                       | -0,136          | 0,0075  |
| H&Y (ON)                   | 0,465           | <0,0001 |
| MDS-UPDRS-I                | 0,43            | <0,0001 |
| MDS-UPDRS-II               | 0,483           | <0,0001 |
| MDS-UPDRS-III              | 0,463           | <0,0001 |
| MDS-UPDRS-IV               | 0,096           | 0,1019  |
| MMSE (corrected score)     | -0,442          | <0,0001 |
| MoCA (corrected score)     | -0,474          | <0,0001 |
| STAI-Y1                    | 0,283           | <0,0001 |
| STAI-Y2                    | 0,333           | <0,0001 |
| APATHY scale               | 0,473           | <0,0001 |
| BDI-II                     | 0,376           | <0,0001 |
| BIS-11                     | 0,418           | <0,0001 |
| <i>Concurrent Validity</i> |                 |         |
| IADL (females)             | -0,496          | <0,0001 |
| IADL (males)               | -0,645          | <0,0001 |
